# Supplementary material
Source: Springer Nature journal article supplement (https://www.springermedizin.de/resource/supplementary/13034_2014_272_MOESM2_ESM.pdf/9652688)
Supplement: MOESM2 [file 9652688]

**Table 1: Demographic data, Clinical risk assessment and total SIQ score**

| <b>Suicide risk assessment</b>       | <b>low</b>      | <b>medium</b>    | <b>high</b>     | <b>Total</b>  |
|--------------------------------------|-----------------|------------------|-----------------|---------------|
| <b>n</b>                             | 10              | 18               | 3               | 31            |
| <b>age</b>                           | 15,7 (SD 1.6)   | 15,7 (SD 1.1)    | 16,3 (SD .6)    | 15,6 (SD 1.2) |
| <b>female/male (n)</b>               | 4 / 6           | 12 / 6           | 1 / 2           | 54,8% / 45,2% |
| <b>Diagnosis<sup>1</sup> (n)</b>     |                 |                  |                 | %             |
| <b>F32</b>                           | 4               | 5                | 0               | 26,5%         |
| <b>F41</b>                           | 1               | 0                | 0               | 2,9%          |
| <b>F43</b>                           | 1               | 6                | 0               | 23,5%         |
| <b>F60</b>                           | 0               | 2                | 1               | 8,8%          |
| <b>F90</b>                           | 0               | 0                | 1               | 2,9%          |
| <b>F91</b>                           | 1               | 0                | 0               | 2,9%          |
| <b>F92</b>                           | 4               | 3                | 1               | 26,5%         |
| <b>F94</b>                           | 0               | 1                | 0               | 2,9%          |
| <b>suicide-risk-checklist (mean)</b> | 11.4            | 18.2             | 18.2            | --            |
| <b>SIQ total (mean)</b>              | 53,54 (SD 39,7) | 85,18 (SD: 46,1) | 88,0 (SD: 36,5) | --            |
